# Supplementary material
Source: ML conference proceedings conference paper supplement (https://proceedings.mlr.press/v130/li21b.html)
Supplement: Supplementary file 1 [file li21b-supp.pdf]

## A Useful probability tools

A separable process  $^1 \{G_\phi\}_{\phi \in \Theta}$  with respect to a metric space  $(\Theta, d)$  is *sub-Gaussian* if for any  $\lambda \in \mathbb{R}$  and  $\phi, \phi' \in \Theta$ ,  $\mathbb{E}[e^{\lambda(X_\phi - X_{\phi'})}] \leq e^{\lambda^2 d^2(\phi, \phi')/2}$ . Let also  $\text{diam}(\Theta) = \sup_{\phi, \phi' \in \Theta} d(\phi, \phi')$  be the *diameter* of the metric space  $(\Theta, d)$ . The following result is cited from [van Handel, 2014, Theorem 5.29].

**Lemma 10.** *There exists a universal constant  $C_0 < \infty$  such that for all  $z > 0$  and  $\phi_0 \in \Theta$ ,*

$$\Pr \left[ \sup_{\phi \in \Theta} G_\phi - G_{\phi_0} \geq C_0 \int_0^\infty \sqrt{\ln N(\Theta; d, \epsilon)} d\epsilon + z \right] \leq C_0 e^{-z^2/(C_0 \cdot \text{diam}(\Theta))},$$

where  $N(\Theta; d, \epsilon)$  is the covering number of the metric space  $(\Theta, d)$  up to precision  $\epsilon$ .

## B Omitted proofs in Section 7

*Proof of Lemma 9.* Let  $\mathcal{T}_\zeta$  be all time periods  $t$  such that  $\zeta_t = \zeta$ , and define  $T_\zeta = |\mathcal{T}_\zeta|$ . We have

$$\sum_t \varpi_{\zeta_t, t}^{x_t} \lesssim \sqrt{d} \cdot \sum_\zeta \sum_{t \in \mathcal{T}_\zeta} \alpha_{\zeta_t, t}^{x_t} \omega_{\zeta_t, t}^{x_t}. \quad (27)$$

First by Lemma 8, we have

$$\sum_{t \in \mathcal{T}_\zeta} (\omega_{\zeta_t, t}^{x_t})^2 \leq \ln(\det(\Lambda_{\mathcal{T}_\zeta})) \lesssim d \ln(T_\zeta/d), \quad (28)$$

where the last inequality is due to

$$\det(\Lambda_{\mathcal{T}_\zeta}) \leq \text{tr}(\Lambda_{\mathcal{T}_\zeta}/d)^d \leq ((T_\zeta + 1)/d)^d. \quad (29)$$

Let us now focus on the Right-Hand Side of Eq. (27), let

$$\mathcal{T}_\zeta^+ := \left\{ t \in \mathcal{T}_\zeta : \omega_{\zeta_t, t}^{x_t} \geq \sqrt{d\delta^2/(T \ln^4 T \ln^2(1/\delta))} \right\}$$

and let

$$\begin{aligned} \mathcal{T}_\zeta^- &:= \left\{ t \in \mathcal{T}_\zeta : \omega_{\zeta_t, t}^{x_t} < \sqrt{d\delta^2/(T \ln^4 T \ln^2(1/\delta))} \right\} \\ &= \mathcal{T}_\zeta \setminus \mathcal{T}_\zeta^+. \end{aligned}$$

<sup>1</sup>See Definition 5.22 in [van Handel, 2014] for a technical definition of separable stochastic processes.

We have that

$$\begin{aligned} \sum_{t \in \mathcal{T}_\zeta} \alpha_{\zeta_t, t}^{x_t} \omega_{\zeta_t, t}^{x_t} &= \sum_{t \in \mathcal{T}_\zeta^+} \alpha_{\zeta_t, t}^{x_t} \omega_{\zeta_t, t}^{x_t} + \sum_{t \in \mathcal{T}_\zeta^-} \alpha_{\zeta_t, t}^{x_t} \omega_{\zeta_t, t}^{x_t} \\ &= \sum_{t \in \mathcal{T}_\zeta^+} \sqrt{\ln((T \ln^4 T \ln^2(1/\delta))(\omega_{\zeta_t, t}^{x_t})^2/(d\delta^2))} \omega_{\zeta_t, t}^{x_t} \\ &\quad + \sum_{t \in \mathcal{T}_\zeta^-} \omega_{\zeta_t, t}^{x_t} \\ &\leq \sum_{t \in \mathcal{T}_\zeta^+} \sqrt{\ln((T \ln^4 T \ln^2(1/\delta))(\omega_{\zeta_t, t}^{x_t})^2/(d\delta^2))} \omega_{\zeta_t, t}^{x_t} \\ &\quad + T_\zeta \sqrt{d\delta^2/(T \ln^4 T \ln^2(1/\delta))}. \end{aligned} \quad (30)$$

Note that the univariate function  $f(\tau) = \sqrt{\tau \ln((T \ln^4 T \ln^2(1/\delta))\tau/(d\delta^2))}$  is concave for  $\tau \geq d\delta^2/(T \ln^4 T \ln^2(1/\delta))$ . Applying Jensen's inequality to  $f(\tau)$  with  $\tau = (\omega_{\zeta_t, t}^{x_t})^2$  ( $t \in \mathcal{T}_\zeta^+$ ), we have

$$\begin{aligned} &\sum_{t \in \mathcal{T}_\zeta^+} \sqrt{\ln((T \ln^4 T \ln^2(1/\delta))(\omega_{\zeta_t, t}^{x_t})^2/(d\delta^2))} \omega_{\zeta_t, t}^{x_t} \\ &\leq |\mathcal{T}_\zeta^+| \cdot \sqrt{\frac{\sum_{t \in \mathcal{T}_\zeta^+} (\omega_{\zeta_t, t}^{x_t})^2}{|\mathcal{T}_\zeta^+|}} \\ &\quad \times \sqrt{\ln\left(\frac{T \ln^4 T \ln^2(1/\delta)}{d\delta^2} \cdot \frac{\sum_{t \in \mathcal{T}_\zeta^+} (\omega_{\zeta_t, t}^{x_t})^2}{|\mathcal{T}_\zeta^+|}\right)} \\ &\lesssim \sqrt{|\mathcal{T}_\zeta^+| d \ln(|\mathcal{T}_\zeta|/d) \ln\left(\frac{T \ln^4 T \ln^2(1/\delta)}{d\delta^2} \cdot \frac{d \ln(|\mathcal{T}_\zeta|/d)}{|\mathcal{T}_\zeta^+|}\right)} \\ &\lesssim \sqrt{dT_\zeta \ln(T_\zeta/d) \ln\left(\frac{T \ln^4 T \ln^2(1/\delta)}{d\delta^2} \cdot \frac{d \ln(T_\zeta/d)}{T_\zeta}\right)} \\ &\lesssim \sqrt{dT_\zeta \ln(T_\zeta/d) \ln(T \ln^5 T / (T_\zeta \delta^3))}, \end{aligned} \quad (31)$$

where the second inequality is due to Lemma 8 and Eq. (28), and the third inequality is due to the monotonicity of the function  $g(x) = \sqrt{xd \ln(T_\zeta/d) \ln((T \ln^4 T \ln^2(1/\delta))/(d\delta^2)) \cdot (d \ln(T_\zeta/d)/x)}$  for large enough  $x$ . Combining Eq. (30), and Eq. (31), we have

$$\begin{aligned} \sum_{t \in \mathcal{T}_\zeta} \alpha_{\zeta_t, t}^{x_t} \omega_{\zeta_t, t}^{x_t} &\lesssim \sqrt{dT_\zeta \ln(T_\zeta/d) \ln(T \ln^5 T / (T_\zeta \delta^3))} \\ &\quad + T_\zeta \delta \sqrt{d/(T \ln^4 T \ln^2(1/\delta))}. \end{aligned} \quad (32)$$

By Algorithm 1, we know that  $\varpi_{\zeta_t, t}^{x_t} = \sqrt{d} \cdot \alpha_{\zeta_t, t}^{x_t} \omega_{\zeta_t, t}^{x_t} \geq 2^{1-\zeta}$  for all  $t \in \mathcal{T}_\zeta$ . Subsequently,

$$\begin{aligned} (2^{-\zeta-1})^2 \cdot T_\zeta &\leq \sum_{t \in \mathcal{T}_\zeta} (\varpi_{\zeta_t, t}^{x_t})^2 \leq \sqrt{d} \cdot \max_{t \in \mathcal{T}_\zeta} (\alpha_{\zeta_t, t}^{x_t})^2 \cdot \sum_{t \in \mathcal{T}_\zeta} (\omega_{\zeta_t, t}^{x_t})^2 \\ &\lesssim \sqrt{d} \cdot \log(T \ln^4 T \ln^2(1/\delta)/(d\delta^2)) \cdot d \log T, \end{aligned}$$

where the last inequality holds by applying Lemma 8. Therefore,

$$T_\zeta \lesssim 4^\zeta \cdot d^{3/2} \log T \log(T/\delta). \quad (33)$$

We first divide the resolution levels  $\zeta \in \{0, 1, \dots, \zeta_0\}$  into two different sets:  $\mathcal{Z}_1 := \{0, 1, \dots, \zeta^*\}$  and  $\mathcal{Z}_2 := \{\zeta^* < \zeta \leq \zeta_0\}$ , where  $\zeta^*$  is an integer to be defined later. Clearly  $\mathcal{Z}_1$  and  $\mathcal{Z}_2$  partition  $\{0, \dots, \zeta_0\}$ . Note that  $\sqrt{d} \cdot \sum_{t \in \mathcal{T}_\zeta} \alpha_{\zeta,t}^{x_t} \omega_{\zeta,t}^{x_t} \lesssim 2^{-\zeta} T_\zeta$  because  $\varpi_{\zeta,t}^{x_t} \leq 2^{1-\zeta}$  for all  $t \in \mathcal{T}_\zeta$ .

$$\begin{aligned} \sqrt{d} \sum_{\zeta \in \mathcal{Z}_1} \sum_{t \in \mathcal{T}_\zeta} \alpha_{\zeta,t}^{x_t} \omega_{\zeta,t}^{x_t} &\lesssim \sum_{\zeta=0}^{\zeta^*} 2^{-\zeta} \cdot 4^\zeta \cdot d^{3/2} \log T \log(T/\delta) \\ &\leq 2^{\zeta^*+1} \cdot d^{3/2} \log T \log(T/\delta); \end{aligned} \quad (34)$$

$$\begin{aligned} &\sqrt{d} \sum_{\zeta \in \mathcal{Z}_2} \sum_{t \in \mathcal{T}_\zeta} \alpha_{\zeta,t}^{x_t} \omega_{\zeta,t}^{x_t} \\ &\lesssim d \sum_{\zeta \in \mathcal{Z}_2} \sqrt{T_\zeta \log(T) \log(T \log^5 T / (T_\zeta \delta^3))} + \delta d \sqrt{T} / \log^2 T \\ &\leq d \sqrt{|\mathcal{Z}_2| \left( \sum_{\zeta \in \mathcal{Z}_2} T_\zeta \right) \log(T) \log \left( T \log^5 T \cdot \frac{|\mathcal{Z}_2|}{\delta^3 \sum_{\zeta \in \mathcal{Z}_2} T_\zeta} \right)} \\ &\quad + \delta d \sqrt{T} / \log^2 T \\ &\lesssim d \sqrt{|\mathcal{Z}_2| T \log(T) \log(\log^5 T |\mathcal{Z}_2| / \delta^3)} + \delta d \sqrt{T} / \log^2 T, \end{aligned} \quad (35)$$

where the inequality above Eq. (35) is because of the concavity of the function  $\sqrt{x \ln(T \log^5 T |\mathcal{Z}_2| / (x \delta^3))}$  and Jensen's inequality, and Eq. (35) is due to  $\sum_{\zeta \in \mathcal{Z}_2} T_\zeta \leq T$  and the monotonicity of the function  $\sqrt{x \ln(T \log^5 T |\mathcal{Z}_2| / (x \delta^3))}$ .

Recall that  $\sqrt{T/d}/\delta \leq 2^{\zeta_0} \leq 2\sqrt{T/d}/\delta$ . Select  $\zeta^* = \zeta_0 - \lfloor \log_2(\ln(T) \ln(T/\delta)/\delta) \rfloor$ ; we have that  $|\mathcal{Z}_2| = O(\log \log(T/\delta) + \log(1/\delta))$  and  $2^{\zeta^*} \leq 2\sqrt{T}/(\sqrt{d} \ln(T) \ln(T/\delta))$ .

Finally, we combine Eq. (27), Eq. (34), and Eq. (35), and have that

$$\begin{aligned} \sum_t \varpi_{\zeta,t}^{x_t} &\lesssim \delta d \sqrt{T} + d \sqrt{T \log T \log(1/\delta)} \cdot \log \log(T/\delta) \\ &\lesssim d \sqrt{T \log T \log(1/\delta)} \cdot \log \log(T/\delta), \end{aligned}$$

which is to be demonstrated.  $\square$
